# Supplementary material for: Constructing single-crystalline hierarchical plate-like ZSM-5 zeolites with short b-axis length for catalyzing MTO reactions
Source: Royal Society of Chemistry journal article supplement (doi:10.1039/d1qi01598b), 2022-01-01
Supplement: d1qi01598b1.pdf [file d1qi01598b1.pdf]

**Table S1.** The source of reagents in this work <sup>a</sup>

| Reagent                                              | Manufacturer                                 | Content (wt.%) |
|------------------------------------------------------|----------------------------------------------|----------------|
| Tetraethylorthosilicate (TEOS)                       | Tianjin Kermel Chemical Reagents Company     | ≥ 98.0         |
| Tetrapropylammonium hydroxide (TPAOH) solution       | Shanghai Bangcheng Chemical Reagents Company | 25             |
| Al(NO <sub>3</sub> ) <sub>3</sub> ·9H <sub>2</sub> O | Beijing Chemical Reagents Company            | ≥ 99.0         |
| Tetramethylguanidine (TMG)                           | Sass Chemical Reagents Company               | 98             |
| Tetramethylurea (TMU)                                | Beijing Bailingwei Technology Co., Ltd.      | 98             |
| NaOH                                                 | Tianjin Kaixin Chemical Industry Co., Ltd.   | ≥ 96.0         |
| NH <sub>4</sub> NO <sub>3</sub>                      | Shanghai Chemical Reagents Factory           | ≥ 99.0         |
| Methanol                                             | Tianjin Kermel Chemical Reagents Company     | ≥ 99.5         |

<sup>a</sup> All of the reagents were used without purification.

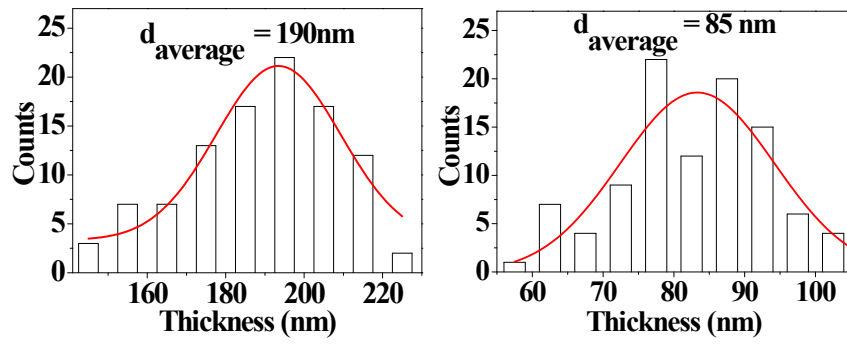

**Fig. S1** Thickness distributions of the O(0.3)-36 and T(0.3)-12.  
Note: the data came from the statistics of 100 particles.

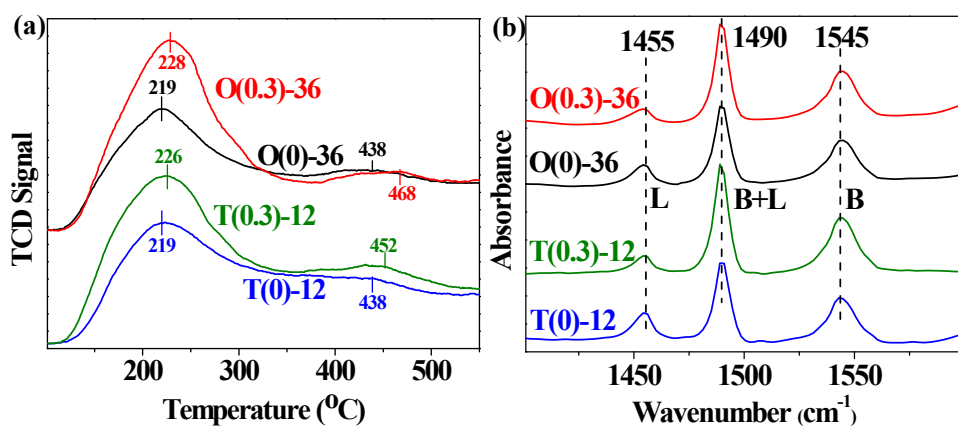

**Fig. S2** NH<sub>3</sub>-TPD profiles (a) and Py-FTIR spectra (b) of the samples synthesized with and without TMG addition.

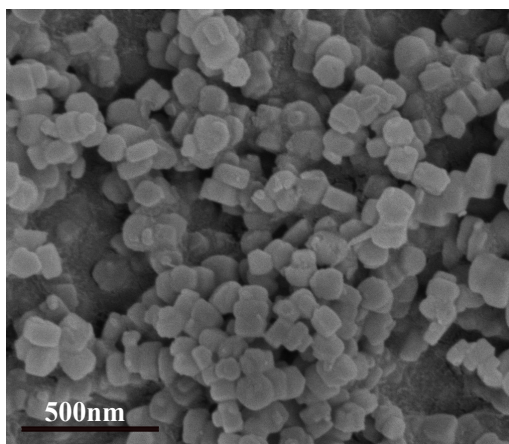

**Fig. S3** SEM image of the ZSM-5 zeolite synthesized using TMU as additive.

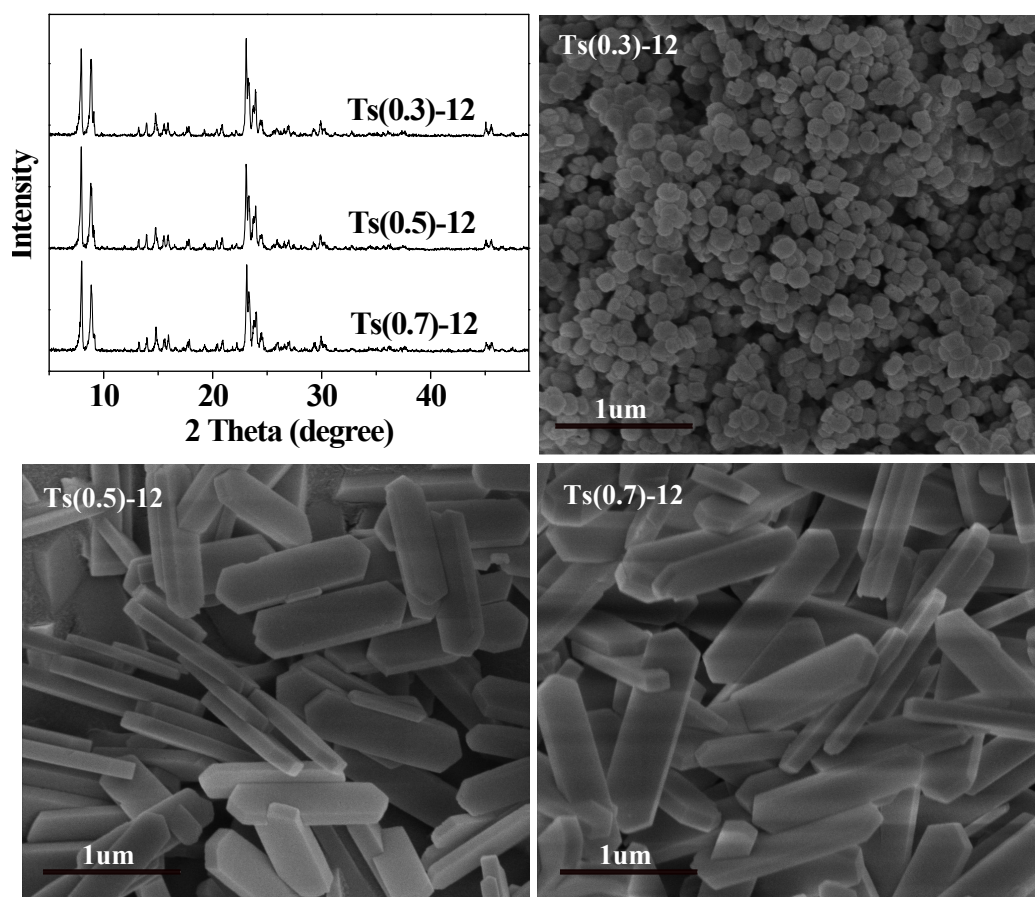

Fig. S4 XRD patterns and SEM images of the as-synthesized Ts(x)-12 samples.
